# Supplementary material for: Design and Synthesis of a Novel NIR Celecoxib-Based Fluorescent Probe for Cyclooxygenase-2 Targeted Bioimaging in Tumor Cells
Source: PubMed Central journal article supplement (PMC7570625; doi:10.3390/molecules25184037), 2020-09-04
Supplement: molecules-25-04037-s001.pdf [file molecules-25-04037-s001.pdf]

## Supplementary Material

### **Design and Synthesis of a Novel NIR Celecoxib-Based Fluorescent Probe for Cyclooxygenase-2 Targeted Bioimaging in Tumor Cells**

Xinli Wang,<sup>1,2</sup> Liye Wang<sup>2</sup>, Lijun Xie,<sup>2,3</sup> Zuoxu Xie,<sup>2</sup> Li Li,<sup>2</sup> Dinh Bui,<sup>2</sup> Taijun Yin,<sup>2</sup> Song Gao,<sup>2</sup> and Ming Hu<sup>2, \*</sup>

<sup>1</sup>Department of Medical Oncology, Fujian Medical University Union Hospital, Fuzhou, Fujian 350001, PR China

<sup>2</sup>Department of Pharmacological and Pharmaceutical Sciences, College of Pharmacy, University of Houston, Houston, TX 77204

<sup>3</sup>Fujian Provincial Key Laboratory of Screening for Novel Microbial Products, Fujian Institute of Microbiology, Fuzhou, Fujian 350007, PR China

## MS of Compound 2

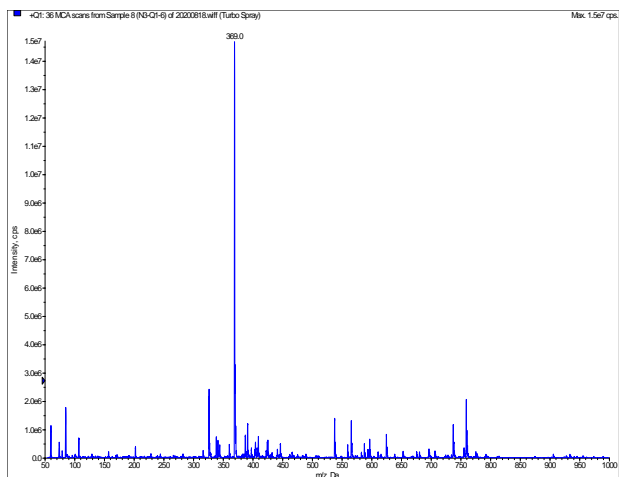

## <sup>1</sup>H-NMR of compound 2

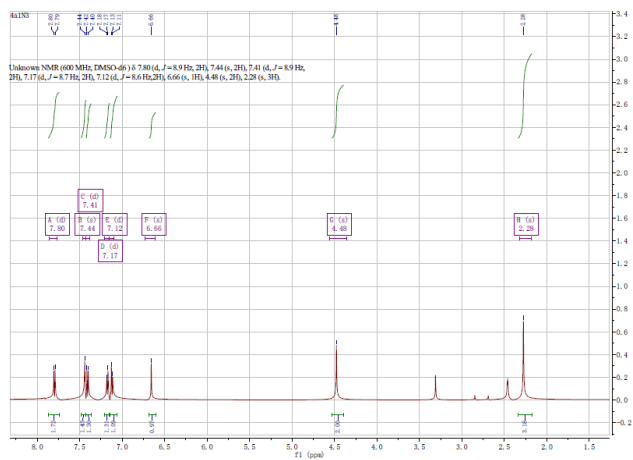

## <sup>13</sup>C-NMR of compound 2

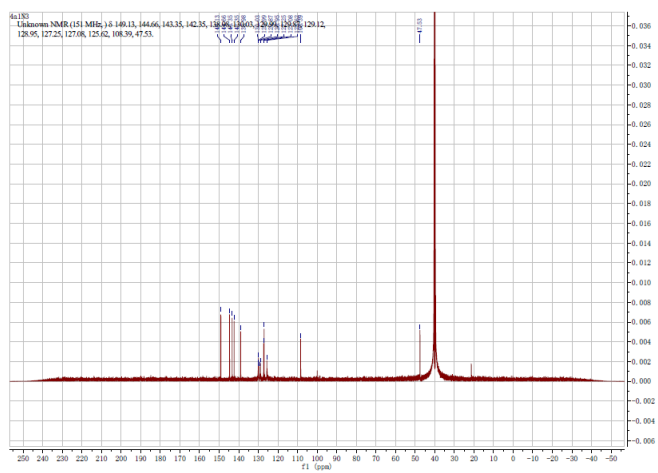

## MS of Compound 3

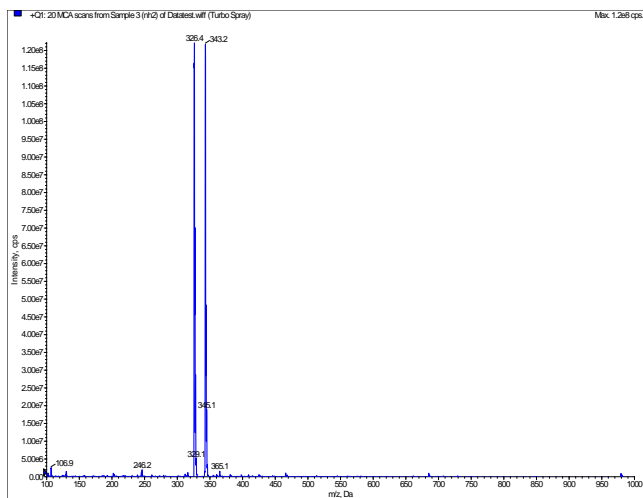

## <sup>1</sup>H-NMR of compound 3

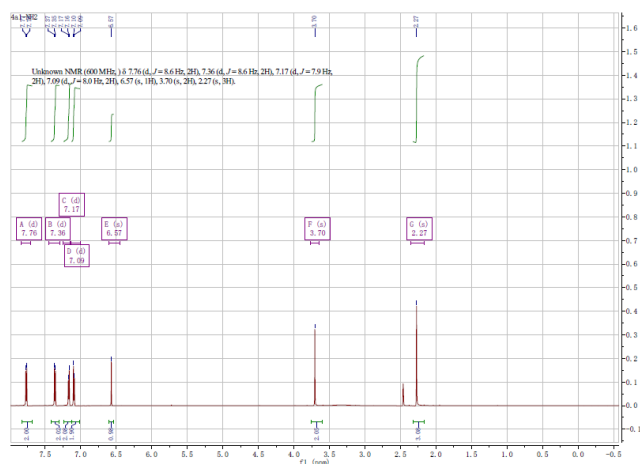

## <sup>13</sup>C-NMR of compound 3

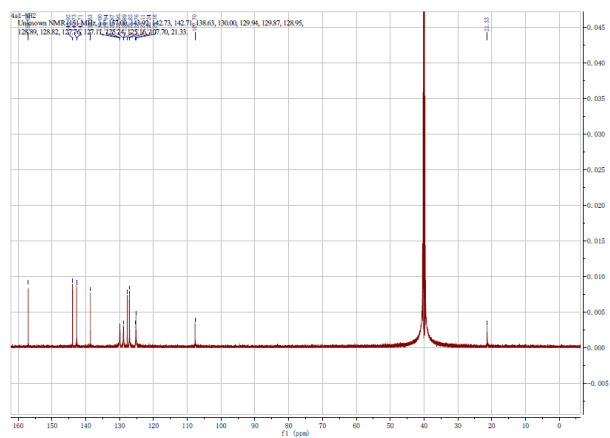

# MS of Compound CCY-5

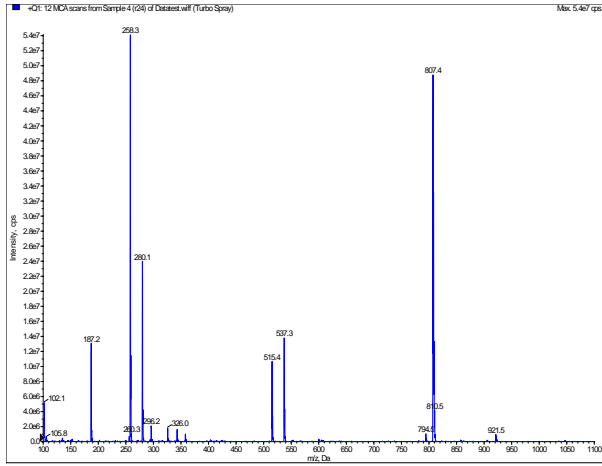

# <sup>1</sup>H-NMR of CCY-5

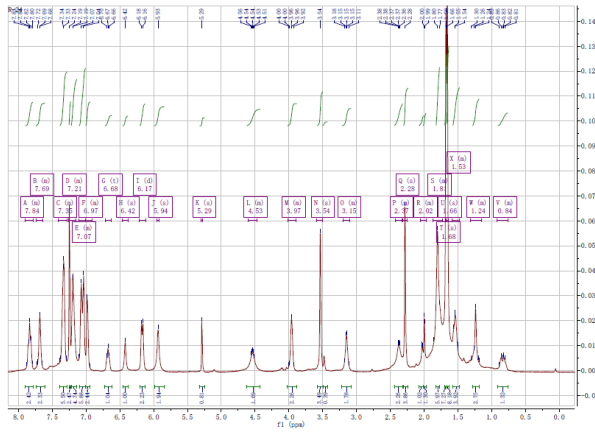

# <sup>13</sup>C-NMR of CCY-5

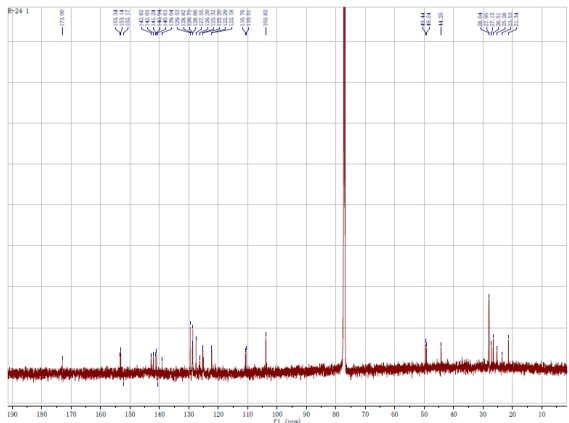

Fluorescent microscopy images of normal and cancer cell lines

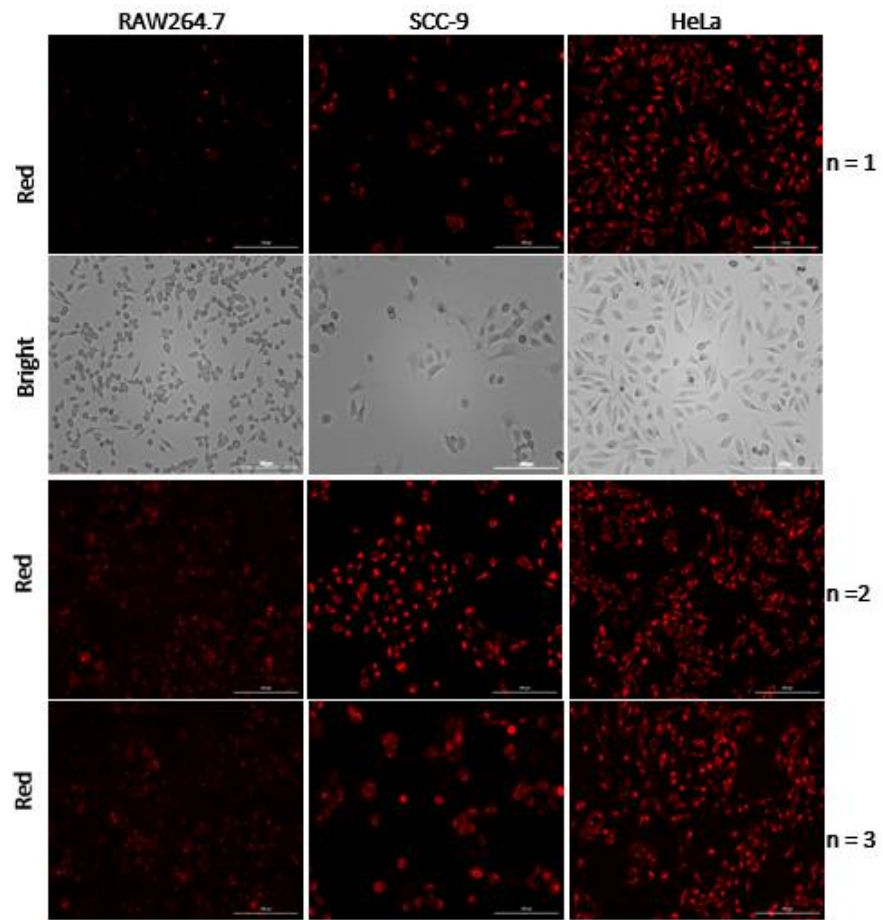

Fig S1. Fluorescence images of RAW264.7, SCC-9 and HeLa cell lines with fluorescent microscopy. All cells were treated with CCY-5 (1  $\mu$ M) for 30 mins. ( $\lambda_{ex}$ : 628 nm; Red,  $\lambda_{em}$ : 685 nm, All the images share the same scale bar: 200  $\mu$ m).

Fluorescence images of LPS-treated cells

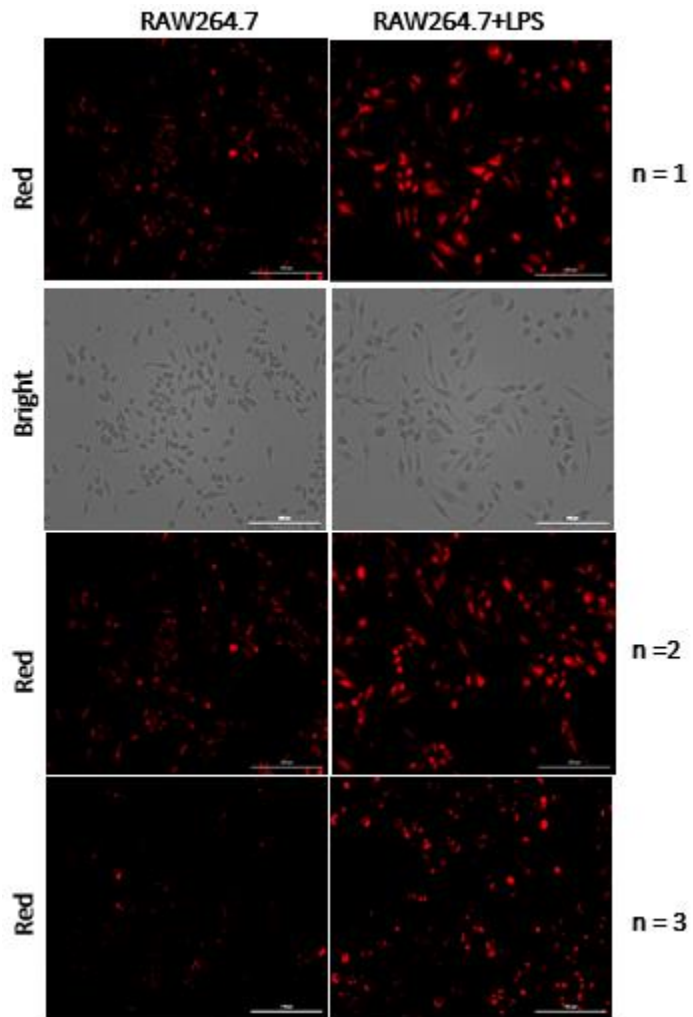

Fig S2 Fluorescent images of RAW264.7 and inflamed RAW264.7 cells. Fluorescence images of LPS-induced inflamed cell lines (RAW264.7 cells). Cells were incubated with LPS (1 ug/mL) for 12 h, followed by CCY-5 treatment (1  $\mu$ M) for 2 h ( $\lambda_{ex}$ : 628 nm; Red,  $\lambda_{em}$ : 685 nm). All the images share the same scale bar: 200  $\mu$ m).

COX-2 inhibitory effect

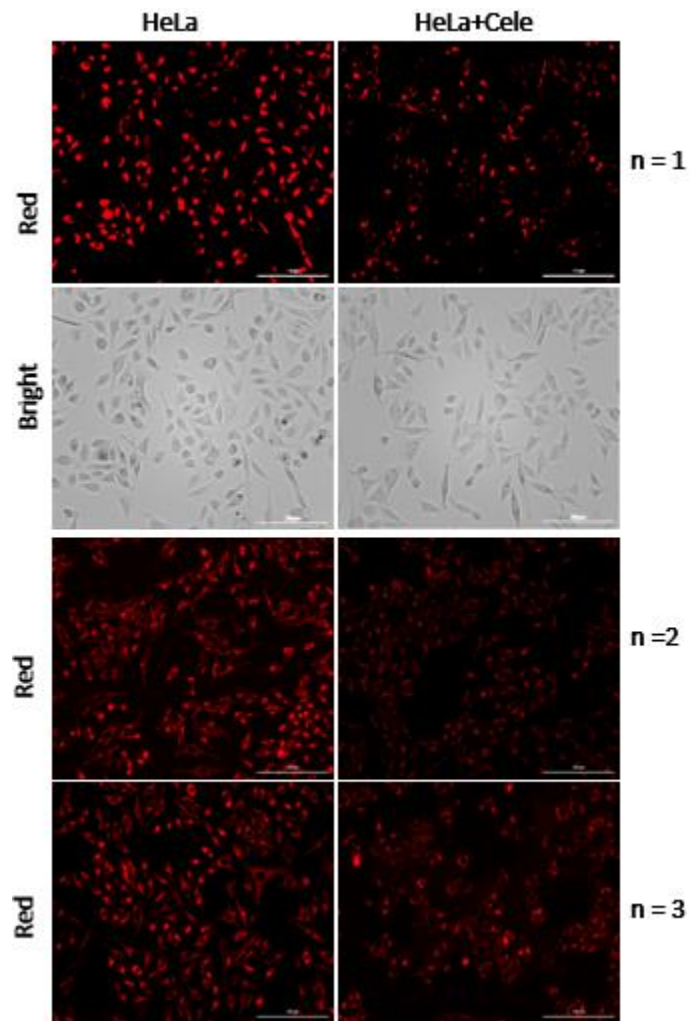

.Fig S3. COX-2 inhibitory effect. Fluorescent images of HeLa and HeLa cells pre-treated with COX-2 inhibitors (Cele = Celecoxib), fluorescent microscopy images with treatment of CCY-5 (1  $\mu$ M) for 30 mins ( $\lambda_{ex}$ : 628 nm; Red,  $\lambda_{em}$ : 685 nm, All the images share the same scale bar: 200  $\mu$ m).
